# Supplementary material for: Acceptability and feasibility of using non-specialist health workers to deliver mental health care: Stakeholder perceptions from the PRIME district sites in Ethiopia, India, Nepal, South Africa, and Uganda
Source: PubMed Central journal article supplement — Soc Sci Med. 2014 Oct;118:33–42. doi: 10.1016/j.socscimed.2014.07.057 (PMC4167946; doi:10.1016/j.socscimed.2014.07.057), 2014-10
Supplement: mmc1.pdf [file mmc1.pdf]

**A1. Unemployment rates data sources**

| Country        | WDI                              | Layard      | OECD                             | Mitchell                 | Used in this paper |
|----------------|----------------------------------|-------------|----------------------------------|--------------------------|--------------------|
| Austria        | 1982 - 2012                      | 1955 - 1990 | 1968 - 2007                      | 1947 - 2008              | 1956 -2012         |
| Belgium        | 1983 - 2012                      | 1955 - 1990 | 1960 - 2007                      | 1921-1939, 1948 -2003    | 1954-2012          |
| Bulgaria       | 1993 - 2012                      | N/A         | N/A                              | 1990 - 2008              | 1990-2012          |
| Croatia        | 1991, 1996 - 2012                | N/A         | N/A                              | 1981 - 2007              | 1981-2012          |
| Cyprus         | 1999 - 2012                      | N/A         | N/A                              | 1967 - 2005              | 1967-2012          |
| Czech Republic | 1991, 1993 - 2012                | N/A         | 1990 - 2007                      | 1990 - 2008              | 1990-2012          |
| Denmark        | 1983 - 2012                      | 1955 - 1990 | 1960, 1965, 1967,<br>1969 - 2007 | 1910 - 1997, 2001 - 2008 | 1953-2012          |
| Estonia        | 1989 - 2012                      | N/A         | N/A                              | 1990 - 1994, 1998 - 2008 | 1989-2012          |
| Finland        | 1980 - 2012                      | 1955 - 1990 | 1960 - 2007                      | 1958 - 2008              | 1956-2012          |
| France         | 1980 - 2012                      | 1955 - 1990 | 1960 - 2007                      | 1900 - 1913, 1970 - 2008 | 1955-2012          |
| Germany        | 1991 - 2012                      | 1955 - 1990 | 1960 - 2007                      | 1900 - 1938, 1948 - 2008 | 1955-2012          |
| Greece         | 1981 - 2012                      | N/A         | 1961, 1977 - 2007                | 1974 - 1993, 1999 - 2007 | 1951-2012          |
| Hungary        | 1992 - 2012                      | N/A         | 1992 - 2007                      | 1990 - 1999, 2003 - 2008 | 1990-2012          |
| Ireland        | 1983 - 2012                      | 1955 - 1990 | 1960 - 2007                      | 1939 - 2008              | 1956-2012          |
| Italy          | 1980 - 2012                      | 1955 - 1990 | 1960 - 2007                      | 1947 - 2008              | 1951-2012          |
| Latvia         | 1996 - 2012                      | N/A         | N/A                              | 1992 - 2007              | 1992-2012          |
| Lithuania      | 1994 - 2012                      | N/A         | N/A                              | 1991 - 2008              | 1991-2012          |
| Luxembourg     | 1983 - 2012                      | N/A         | 1974 - 2007                      | 1975 - 2008              | 1953-2012          |
| Macedonia      | 1997 - 2012                      | N/A         | N/A                              | 1982 - 2000              | 1982-2012          |
| Malta          | 2000 - 2012                      | N/A         | N/A                              | 1983 - 2007              | 1983-2012          |
| Netherlands    | 1981, 1983, 1985,<br>1987 - 2012 | 1955 - 1990 | 1975 - 2007                      | 1911 - 1939, 1948 - 2008 | 1955-2012          |
| Poland         | 1992 - 2012                      | N/A         | 1990 - 2007                      | 1927 - 1938, 1990 - 2008 | 1990-2012          |
| Portugal       | 1980 - 2012                      | N/A         | 1960, 1974 - 2007                | 1992, 1993               | 1960, 1974-2012    |
| Romania        | 1994 - 2012                      | N/A         | N/A                              | 1991 - 2008              | 1991-2012          |
| Slovakia       | 1993 - 2012                      | N/A         | 1994 - 2007                      | 1991 - 2008              | 1991-2012          |
| Slovenia       | 1991, 1993 - 2012                | N/A         | N/A                              | 1986 - 2006              | 1986-2012          |
| Spain          | 1980 - 2012                      | 1955 - 1990 | 1960 - 2007                      | 1968 - 2008              | 1955-2012          |
| Sweden         | 1980 - 2012                      | 1955 - 1990 | 1963 - 2007                      | 1925 - 2008              | 1952-2012          |
| Switzerland    | 1990 - 2012                      | 1955 - 1990 | 1960 - 2007                      | 1926 - 1950, 1974 - 2008 | 1948, 1955-2012    |
| Turkey         | 1985, 1987 - 2012                | N/A         | 1960 - 2007                      | N/A                      | 1960               |
| United Kingdom | 1984 - 2012                      | 1955 - 1990 | 1960 - 2007                      | 1900 - 2008              | 1956               |

## A2. Summary statistics, by country

| Country                             | Household income sample |                    | Health sample |                    | Life Dissatisfaction sample |                    | Obesity sample |                    | Smoke sample |                    | Drink sample |                    |
|-------------------------------------|-------------------------|--------------------|---------------|--------------------|-----------------------------|--------------------|----------------|--------------------|--------------|--------------------|--------------|--------------------|
|                                     | Mean                    | Years of schooling | Mean          | Years of schooling | Mean                        | Years of schooling | Mean           | Years of schooling | Mean         | Years of schooling | Mean         | Years of schooling |
| <i>Panel A: Unrestricted sample</i> |                         |                    |               |                    |                             |                    |                |                    |              |                    |              |                    |
| Austria                             | 2.21                    | 11.05              | 0.17          | 11.16              | 0.13                        | 11.33              | 0.07           | 11.25              | 0.41         | 11.17              | 0.15         | 11.13              |
| Belgium                             | 2.24                    | 11.86              | 0.18          | 12.33              | 0.12                        | 12.98              | 0.13           | 12.20              | 0.34         | 12.50              | 0.08         | 12.67              |
| Bulgaria                            |                         |                    | 0.30          | 12.49              | 0.62                        | 12.95              | 0.14           | 12.86              | 0.48         | 12.83              | 0.08         | 12.65              |
| Croatia                             |                         |                    | 0.25          | 12.06              | 0.31                        | 11.99              | 0.11           | 12.14              | 0.40         | 11.97              | 0.06         | 11.97              |
| Cyprus                              |                         |                    | 0.21          | 11.37              | 0.28                        | 11.50              | 0.17           | 12.49              | 0.41         | 11.16              | 0.05         | 10.90              |
| Czech Republic                      |                         |                    | 0.21          | 11.95              | 0.21                        | 12.01              | 0.08           | 12.04              | 0.34         | 11.96              | 0.05         | 11.94              |
| Denmark                             | 1.85                    | 15.30              | 0.16          | 15.91              | 0.03                        | 16.87              | 0.13           | 15.88              | 0.34         | 16.12              | 0.06         | 16.57              |
| Estonia                             |                         |                    | 0.38          | 12.53              | 0.32                        | 12.80              | 0.11           | 12.47              | 0.37         | 12.80              | 0.04         | 12.84              |
| Finland                             | 2.08                    | 13.78              | 0.23          | 14.19              | 0.05                        | 15.39              | 0.16           | 14.15              | 0.33         | 14.82              | 0.04         | 15.29              |
| France                              | 2.49                    | 11.92              | 0.22          | 12.33              | 0.17                        | 12.82              | 0.09           | 12.34              | 0.41         | 12.66              | 0.05         | 12.84              |
| Germany                             | 2.31                    | 11.33              | 0.24          | 11.36              | 0.20                        | 11.84              | 0.10           | 11.62              | 0.40         | 11.40              | 0.11         | 11.35              |
| Greece                              | 2.14                    | 10.67              | 0.10          | 11.42              | 0.50                        | 11.94              | 0.15           | 11.26              | 0.54         | 11.58              | 0.08         | 11.59              |
| Hungary                             |                         |                    | 0.40          | 10.60              | 0.53                        | 10.94              | 0.16           | 10.68              | 0.45         | 10.81              | 0.08         | 10.73              |
| Ireland                             | 2.25                    | 10.67              | 0.09          | 11.11              | 0.12                        | 11.65              | 0.12           | 11.12              | 0.35         | 11.26              | 0.08         | 11.37              |
| Italy                               | 2.42                    | 11.56              | 0.21          | 11.49              | 0.28                        | 11.85              | 0.06           | 11.62              | 0.33         | 11.58              | 0.09         | 11.43              |
| Latvia                              |                         |                    | 0.51          | 11.87              | 0.42                        | 12.17              | 0.16           | 11.90              | 0.40         | 11.87              | 0.03         | 11.89              |
| Lithuania                           |                         |                    | 0.48          | 12.46              | 0.45                        | 12.58              | 0.16           | 12.42              | 0.39         | 12.73              | 0.05         | 12.72              |
| Luxembourg                          | 2.33                    | 11.53              | 0.18          | 11.76              | 0.07                        | 12.85              | 0.12           | 11.63              | 0.32         | 12.11              | 0.05         | 12.08              |
| Macedonia                           |                         |                    |               |                    | 0.38                        | 11.10              |                |                    | 0.43         | 10.75              |              | 10.75              |
| Malta                               |                         |                    | 0.17          | 9.98               | 0.21                        | 10.18              | 0.24           | 10.10              | 0.29         | 10.11              | 0.03         | 10.12              |
| Netherlands                         | 2.37                    | 12.46              | 0.17          | 13.25              | 0.06                        | 14.04              | 0.13           | 12.89              | 0.33         | 13.62              | 0.07         | 14.13              |
| Poland                              |                         |                    | 0.32          | 12.45              | 0.25                        | 12.81              | 0.13           | 12.61              | 0.41         | 12.59              | 0.02         | 12.59              |
| Portugal                            | 2.46                    | 7.74               | 0.33          | 8.15               | 0.51                        | 8.44               | 0.12           | 8.01               | 0.32         | 8.43               | 0.10         | 8.58               |
| Romania                             |                         |                    | 0.29          | 12.17              | 0.53                        | 12.30              | 0.11           | 12.27              | 0.36         | 12.20              | 0.13         | 12.14              |
| Slovak Republic                     |                         |                    | 0.26          | 12.04              | 0.33                        | 12.17              | 0.11           | 12.25              | 0.30         | 12.12              | 0.06         | 12.09              |
| Slovenia                            |                         |                    | 0.18          | 12.48              | 0.13                        | 12.73              | 0.09           | 12.56              | 0.31         | 12.67              | 0.05         | 12.69              |
| Spain                               | 2.14                    | 10.33              | 0.14          | 10.86              | 0.22                        | 11.00              | 0.10           | 10.90              | 0.45         | 10.95              | 0.13         | 10.84              |
| Sweden                              | 2.28                    | 14.14              | 0.21          | 14.99              | 0.04                        | 16.11              | 0.10           | 15.23              | 0.27         | 15.45              | 0.01         | 15.54              |
| Turkey                              |                         |                    | 0.21          | 7.71               | 0.33                        | 7.89               | 0.12           | 7.97               | 0.42         | 7.99               |              | 7.99               |
| United Kingdom                      | 2.23                    | 10.18              | 0.22          | 10.60              | 0.11                        | 11.24              | 0.18           | 10.57              | 0.38         | 10.96              | 0.11         | 11.19              |

**A2. Summary statistics, by country (continued)**

| Country                           | Household income |                    | Health sample |                    | Life Dissatisfaction |                    | Obesity sample |                    | Smoke sample |                    | Drink sample |                    |
|-----------------------------------|------------------|--------------------|---------------|--------------------|----------------------|--------------------|----------------|--------------------|--------------|--------------------|--------------|--------------------|
|                                   | Mean             | Years of schooling | Mean          | Years of schooling | Mean                 | Years of schooling | Mean           | Years of schooling | Mean         | Years of schooling | Mean         | Years of schooling |
| <i>Panel B: Restricted sample</i> |                  |                    |               |                    |                      |                    |                |                    |              |                    |              |                    |
| Austria                           | 2.21             | 11.05              | 0.17          | 11.16              | 0.13                 | 11.33              | 0.07           | 11.25              | 0.41         | 11.16              | 0.15         | 11.13              |
| Belgium                           | 2.24             | 11.86              | 0.18          | 12.33              | 0.12                 | 12.97              | 0.13           | 12.20              | 0.34         | 12.50              | 0.08         | 12.67              |
| Bulgaria                          |                  |                    | 0.16          | 13.95              | 0.54                 | 14.22              | 0.06           | 14.75              | 0.50         | 13.91              | 0.06         | 13.73              |
| Croatia                           |                  |                    | 0.16          | 12.67              | 0.27                 | 12.46              | 0.07           | 12.77              | 0.41         | 12.54              | 0.05         | 12.54              |
| Cyprus                            |                  |                    | 0.19          | 11.71              | 0.28                 | 11.70              | 0.16           | 12.90              | 0.41         | 11.35              | 0.05         | 11.07              |
| Czech Republic                    |                  |                    | 0.09          | 12.47              | 0.18                 | 12.50              | 0.03           | 12.63              | 0.31         | 12.37              | 0.05         | 12.31              |
| Denmark                           | 1.85             | 15.30              | 0.16          | 15.91              | 0.03                 | 16.85              | 0.13           | 15.88              | 0.34         | 16.10              | 0.06         | 16.57              |
| Estonia                           |                  |                    | 0.23          | 13.70              | 0.24                 | 13.87              | 0.07           | 13.64              | 0.34         | 13.81              | 0.03         | 14.00              |
| Finland                           | 2.08             | 13.78              | 0.23          | 14.19              | 0.05                 | 15.35              | 0.16           | 14.15              | 0.33         | 14.81              | 0.04         | 15.29              |
| France                            | 2.49             | 11.92              | 0.22          | 12.33              | 0.17                 | 12.81              | 0.09           | 12.34              | 0.41         | 12.66              | 0.05         | 12.84              |
| Germany                           | 2.31             | 11.33              | 0.24          | 11.36              | 0.20                 | 11.83              | 0.10           | 11.62              | 0.39         | 11.40              | 0.11         | 11.35              |
| Greece                            | 2.08             | 12.12              | 0.07          | 12.45              | 0.50                 | 12.48              | 0.13           | 12.15              | 0.55         | 12.33              | 0.09         | 12.22              |
| Hungary                           |                  |                    | 0.19          | 11.61              | 0.47                 | 11.73              | 0.09           | 12.02              | 0.43         | 11.58              | 0.03         | 11.51              |
| Ireland                           | 2.25             | 10.67              | 0.09          | 11.11              | 0.12                 | 11.65              | 0.12           | 11.12              | 0.35         | 11.26              | 0.08         | 11.37              |
| Italy                             | 2.42             | 11.56              | 0.21          | 11.49              | 0.28                 | 11.84              | 0.06           | 11.62              | 0.33         | 11.58              | 0.09         | 11.43              |
| Latvia                            |                  |                    | 0.31          | 12.91              | 0.33                 | 13.17              | 0.05           | 13.19              | 0.40         | 12.76              | 0.03         | 12.75              |
| Lithuania                         |                  |                    | 0.33          | 13.34              | 0.33                 | 13.41              | 0.09           | 13.02              | 0.37         | 13.75              | 0.03         | 13.42              |
| Luxembourg                        | 2.30             | 12.26              | 0.15          | 12.55              | 0.06                 | 13.28              | 0.09           | 12.45              | 0.32         | 12.70              | 0.05         | 12.62              |
| Macedonia                         |                  |                    |               |                    | 0.36                 | 11.61              |                |                    | 0.39         | 11.47              |              | 11.47              |
| Malta                             |                  |                    | 0.09          | 11.46              | 0.19                 | 11.15              | 0.17           | 12.02              | 0.31         | 11.11              | 0.02         | 10.97              |
| Netherlands                       | 2.37             | 12.46              | 0.17          | 13.25              | 0.06                 | 14.02              | 0.13           | 12.89              | 0.33         | 13.62              | 0.07         | 14.13              |
| Poland                            |                  |                    | 0.20          | 13.72              | 0.17                 | 13.82              | 0.06           | 13.97              | 0.36         | 13.82              | 0.03         | 13.66              |
| Portugal                          | 2.33             | 9.41               | 0.24          | 9.58               | 0.49                 | 9.47               | 0.11           | 9.34               | 0.36         | 9.66               | 0.08         | 9.68               |
| Romania                           |                  |                    | 0.15          | 13.91              | 0.46                 | 13.51              | 0.05           | 14.16              | 0.40         | 13.43              | 0.11         | 13.68              |
| Slovak Republic                   |                  |                    | 0.13          | 12.63              | 0.26                 | 12.74              | 0.05           | 12.50              | 0.29         | 12.77              | 0.05         | 12.83              |
| Slovenia                          |                  |                    | 0.08          | 13.73              | 0.11                 | 13.77              | 0.05           | 14.00              | 0.32         | 13.80              | 0.02         | 13.89              |
| Spain                             | 2.14             | 10.41              | 0.14          | 10.86              | 0.22                 | 10.99              | 0.10           | 10.90              | 0.45         | 10.95              | 0.13         | 10.84              |
| Sweden                            | 2.28             | 14.14              | 0.21          | 14.99              | 0.04                 | 16.10              | 0.10           | 15.23              | 0.27         | 15.45              | 0.01         | 15.54              |
| Turkey                            |                  |                    | 0.21          | 7.71               | 0.33                 | 7.89               | 0.12           | 7.97               | 0.42         | 7.99               |              | 7.99               |
| United Kingdom                    | 2.23             | 10.18              | 0.22          | 10.60              | 0.11                 | 11.23              | 0.18           | 10.57              | 0.38         | 10.95              | 0.11         | 11.19              |

### A3: Marginal Effects of Unemployment rates when graduating and Education on Outcomes

|                                         | (1)                                 | (2)                              | (3)                                  | (4)                 | (5)                   | (6)                        |
|-----------------------------------------|-------------------------------------|----------------------------------|--------------------------------------|---------------------|-----------------------|----------------------------|
| Dependent variables                     | Lower household<br>income (Yes = 1) | General Poor<br>Health (Yes = 1) | Life<br>dissatisfaction<br>(Yes = 1) | Obesity<br>(Yes =1) | Smoker<br>(Yes = 1)   | Daily drinker<br>(Yes = 1) |
| UR when graduating<br>(3 years average) | 0.554***<br>(0.203)                 | 0.105<br>(0.150)                 | 0.0399<br>(0.0642)                   | 0.791<br>(1.055)    | 0.397***<br>(0.125)   | 0.121<br>(0.0816)          |
| (Education - 9) * UR                    | -0.0536*<br>(0.0303)                | -0.0433**<br>(0.0196)            | -0.0218**<br>(0.00873)               | -0.267*<br>(0.138)  | -0.0414**<br>(0.0196) | -0.0173<br>(0.0126)        |
| Observations                            | 50,590                              | 28,440                           | 87,450                               | 17,697              | 48,367                | 19,639                     |

Note: All columns are estimated in logistic model. Marginal effects at mean are reported. see Table 2 notes for sample and specification details. \*\* p<0.05, \* p<0.1.

#### A4. Education, Unemployment Rate and Outcomes in Eurobarometer

|                                         | (1)                                       | (2)                              | (3)                               | (4)                 | (5)                 | (6)                        |
|-----------------------------------------|-------------------------------------------|----------------------------------|-----------------------------------|---------------------|---------------------|----------------------------|
| Dependent variables                     | Income Quartile<br>(1:highest - 4:lowest) | General Poor<br>Health (Yes = 1) | Life dissatisfaction<br>(Yes = 1) | Obesity<br>(Yes =1) | Smoker<br>(Yes = 1) | Daily drinker<br>(Yes = 1) |
| UR when graduating (3 years<br>average) | 1.313**<br>(0.372)                        | 0.052<br>(0.134)                 | 0.122*<br>(0.072)                 | 0.089<br>(0.128)    | 0.411**<br>(0.120)  | 0.203*<br>(0.123)          |
| (Education - 9) * UR                    | -0.102*<br>(0.053)                        | -0.033**<br>(0.016)              | -0.047**<br>(0.010)               | -0.047**<br>(0.019) | -0.041**<br>(0.017) | -0.028<br>(0.018)          |
| Years of schooling                      | 0.004<br>(0.009)                          | 0.005<br>(0.004)                 | 0.004**<br>(0.002)                | 0.009**<br>(0.004)  | -0.001<br>(0.004)   | -0.002<br>(0.003)          |
| Education * Experience                  | -0.053**<br>(0.009)                       | 0.001<br>(0.004)                 | -0.009**<br>(0.002)               | -0.002<br>(0.004)   | -0.015**<br>(0.004) | 0.004<br>(0.003)           |
| Education * Experience <sup>2</sup>     | 0.008**<br>(0.002)                        | -0.001<br>(0.001)                | 0.001**<br>(0.001)                | -0.001<br>(0.001)   | 0.003**<br>(0.001)  | -0.001*<br>(0.001)         |
| Male                                    | -0.068**<br>(0.009)                       | -0.019**<br>(0.005)              | 0.007**<br>(0.003)                | 0.004<br>(0.005)    | 0.106**<br>(0.005)  | 0.088**<br>(0.004)         |
| Married                                 | -0.923**<br>(0.017)                       | -0.066**<br>(0.006)              | -0.091**<br>(0.003)               | 0.006<br>(0.005)    | -0.125**<br>(0.005) | -0.033**<br>(0.005)        |
| Observations                            | 50,590                                    | 28,440                           | 87,450                            | 17,697              | 48,367              | 19,656                     |
| R-squared                               | 0.259                                     | 0.063                            | 0.169                             | 0.038               | 0.073               | 0.065                      |

Note: see Table 2 notes for sample and specification details. \*\* p<0.05, \* p<0.1.

### A5. Education, Unemployment Rate and Outcomes in Eurobarometer, by Gender

| Dependent variables                                                                      | (1)<br>Income Quartile<br>(1:highest - 4:lowest) | (2)<br>General Poor<br>Health (Yes = 1) | (3)<br>Life dissatisfaction<br>(Yes = 1) | (4)<br>Obesity<br>(Yes = 1)    | (5)<br>Smoker<br>(Yes = 1)     | (6)<br>Daily drinker<br>(Yes = 1) |
|------------------------------------------------------------------------------------------|--------------------------------------------------|-----------------------------------------|------------------------------------------|--------------------------------|--------------------------------|-----------------------------------|
| <b>Panel A: Male sample</b>                                                              |                                                  |                                         |                                          |                                |                                |                                   |
| UR when graduating (3<br>years average)                                                  | 1.612**<br>(0.488)<br>[0.743]                    | 0.075<br>(0.208)<br>[0.299]             | 0.273**<br>(0.104)<br>[0.084]            | -0.182<br>(0.213)<br>[0.231]   | 0.352**<br>(0.173)<br>[0.212]  | 0.379*<br>(0.205)<br>[0.187]      |
| (Education - 9) * UR                                                                     | -0.074<br>(0.059)<br>[0.113]                     | -0.023<br>(0.026)<br>[0.031]            | -0.068**<br>(0.013)<br>[0.016]           | -0.028<br>(0.027)<br>[0.028]   | -0.025<br>(0.025)<br>[0.037]   | -0.043<br>(0.029)<br>[0.025]      |
| Observations                                                                             | 24,457                                           | 12,792                                  | 39,650                                   | 8,146                          | 21,538                         | 8,640                             |
| R-squared                                                                                | 0.229                                            | 0.075                                   | 0.171                                    | 0.045                          | 0.075                          | 0.066                             |
| <b>Panel B: Female sample</b>                                                            |                                                  |                                         |                                          |                                |                                |                                   |
| UR when graduating (3<br>years average)                                                  | 0.883*<br>(0.526)<br>[0.796]                     | 0.017<br>(0.176)<br>[0.162]             | -0.063<br>(0.096)<br>[0.116]             | 0.302*<br>(0.171)<br>[0.207]   | 0.444**<br>(0.151)<br>[0.191]  | 0.047<br>(0.114)<br>[0.096]       |
| (Education - 9) * UR                                                                     | -0.129*<br>(0.072)<br>[0.144]                    | -0.035<br>(0.024)<br>[0.018]            | -0.027**<br>(0.012)<br>[0.018]           | -0.069**<br>(0.026)<br>[0.030] | -0.053**<br>(0.019)<br>[0.025] | -0.015<br>(0.014)<br>[0.010]      |
| Observations                                                                             | 26,133                                           | 15,648                                  | 47,800                                   | 9,588                          | 26,829                         | 11,016                            |
| R-squared                                                                                | 0.306                                            | 0.071                                   | 0.176                                    | 0.056                          | 0.068                          | 0.034                             |
| <i>Joint tests for relevant coefficients in Panel A are the same as those in Panel B</i> |                                                  |                                         |                                          |                                |                                |                                   |
| Chi-2 statistics                                                                         | 3.42                                             | 0.16                                    | 9.97                                     | 3.32                           | 0.55                           | 1.55                              |
| P-value                                                                                  | 0.181                                            | 0.93                                    | 0.01                                     | 0.19                           | 0.76                           | 0.46                              |

Note: see Table 2 notes for sample and specification details. \*\* p<0.05, \* p<0.1.

### A6. Education, Unemployment Rates and Outcomes in Different Age Groups

| Dependent variables                    | (1)<br>Income Quartile<br>(1:highest - 4:lowest) | (2)<br>General Poor<br>Health (Yes = 1) | (3)<br>Life dissatisfaction<br>(Yes = 1) | (4)<br>Obesity<br>(Yes =1)     | (5)<br>Smoker<br>(Yes = 1)     | (6)<br>Daily drinker<br>(Yes = 1) |
|----------------------------------------|--------------------------------------------------|-----------------------------------------|------------------------------------------|--------------------------------|--------------------------------|-----------------------------------|
| UR * (Ages 25-40)                      | 1.620**<br>(0.372)<br>[0.707]                    | 0.065<br>(0.133)<br>[0.183]             | 0.187**<br>(0.076)<br>[0.097]            | 0.088<br>(0.129)<br>[0.161]    | 0.417**<br>(0.123)<br>[0.188]  | 0.197<br>(0.123)<br>[0.112]       |
| (Education - 9) * UR *<br>(Ages 25-40) | -0.217**<br>(0.054)<br>[0.120]                   | -0.052**<br>(0.017)<br>[0.017]          | -0.079**<br>(0.011)<br>[0.018]           | -0.052**<br>(0.020)<br>[0.018] | -0.078**<br>(0.018)<br>[0.036] | -0.034*<br>(0.018)<br>[0.014]     |
| UR * (Ages 40-55)                      | -1.912**<br>(0.573)<br>[0.996]                   | -0.003<br>(0.197)<br>[0.192]            | -0.065<br>(0.097)<br>[0.112]             | -0.025<br>(0.209)<br>[0.208]   | 0.419**<br>(0.172)<br>[0.239]  | 0.227<br>(0.177)<br>[0.173]       |
| (Education - 9) * UR *<br>(Ages 40-55) | 0.445**<br>(0.073)<br>[0.152]                    | -0.001<br>(0.024)<br>[0.022]            | 0.002<br>(0.012)<br>[0.015]              | -0.030<br>(0.028)<br>[0.022]   | 0.001<br>(0.022)<br>[0.039]    | -0.022<br>(0.021)<br>[0.019]      |
| Observations                           | 50,590                                           | 28,440                                  | 87,450                                   | 17,734                         | 48,367                         | 19,656                            |
| R-squared                              | 0.263                                            | 0.063                                   | 0.170                                    | 0.038                          | 0.073                          | 0.065                             |

Note: see Table 2 notes for sample and specification details. \*\* p<0.05, \* p<0.1.

### A7: Education, Unemployment Rate, Age and Outcomes in Eurobarometer

|                                      | (1)<br>Income Quartile<br>(1:highest - 4:lowest) | (2)<br>General Poor<br>Health (Yes = 1) | (3)<br>Life dissatisfaction<br>(Yes = 1) | (4)<br>Obesity<br>(Yes =1) | (5)<br>Smoker<br>(Yes = 1) | (6)<br>Daily drinker<br>(Yes = 1) |
|--------------------------------------|--------------------------------------------------|-----------------------------------------|------------------------------------------|----------------------------|----------------------------|-----------------------------------|
| UR when graduating (3 years average) | 2.851**<br>(0.574)                               | 0.267<br>(0.184)                        | 0.421**<br>(0.109)                       | 0.006<br>(0.173)           | 0.491**<br>(0.192)         | 0.037<br>(0.170)                  |
| (Education - 9) * UR                 | -0.657**<br>(0.072)                              | -0.096**<br>(0.024)                     | -0.129**<br>(0.014)                      | -0.069**<br>(0.025)        | -0.164**<br>(0.026)        | -0.059**<br>(0.024)               |
| (Age - 25) * UR                      | -0.214**<br>(0.048)                              | -0.025<br>(0.016)                       | -0.030**<br>(0.008)                      | 0.008<br>(0.014)           | -0.007<br>(0.016)          | 0.018<br>(0.014)                  |
| (Education - 9) * (Age - 25) * UR    | 0.056**<br>(0.004)                               | 0.006**<br>(0.001)                      | 0.007**<br>(0.001)                       | 0.001<br>(0.001)           | 0.009**<br>(0.001)         | 0.001<br>(0.001)                  |
| Years of schooling                   | 0.011<br>(0.009)                                 | 0.007**<br>(0.004)                      | 0.007**<br>(0.002)                       | 0.009**<br>(0.004)         | 0.003<br>(0.004)           | -0.002<br>(0.003)                 |
| Education * Experience               | -0.068**<br>(0.008)                              | -0.001<br>(0.004)                       | -0.011**<br>(0.002)                      | -0.003<br>(0.004)          | -0.018**<br>(0.004)        | 0.004<br>(0.003)                  |
| Education * Experience <sup>2</sup>  | 0.010**<br>(0.002)                               | -0.001<br>(0.001)                       | 0.001**<br>(0.001)                       | -0.001<br>(0.001)          | 0.003**<br>(0.001)         | -0.001<br>(0.001)                 |
| Observations                         | 50,590                                           | 28,440                                  | 87,450                                   | 17,734                     | 48,367                     | 19,656                            |
| R-squared                            | 0.266                                            | 0.063                                   | 0.170                                    | 0.038                      | 0.074                      | 0.065                             |

Note: see Table 2 notes for sample and specification details. \*\* p<0.05, \* p<0.1.



**A8: Education choice and Unemployment Rate when Graduating**

| VARIABLES          | (1)<br>Years of education | (2)<br>Married (Yes = 1) |
|--------------------|---------------------------|--------------------------|
| UR when graduating | -0.508<br>(0.581)         | 0.268***<br>(0.0722)     |
| Years of education |                           | 0.00416***<br>(0.000705) |
| UR*(Education - 9) |                           | 0.0114<br>(0.00782)      |
| Observations       | 295,295                   | 294,951                  |
| R-squared          | 0.411                     | 0.034                    |

Note: Standard errors in parentheses are clustered at country-graduation year level. Weights in Eurobarometers are applied. Samples are combined together. Respondents are aged between 25 and 55. The covariates include indicators for gender, graduation cohorts, years since graduation, UR sources, countries, survey years, sample sources, country interacting with survey years and linear time trends for specific country. \*\* p<0.05, \* p<0.1.

**A9. Education, Unemployment Rates when graduating and Outcomes in Eurobarometer, without controlling for marital status**

| Dependent variables                                                               | (1)<br>Income Quartile<br>(1:highest - 4:lowest) | (2)<br>General Poor<br>Health (Yes = 1) | (3)<br>Life<br>dissatisfaction<br>(Yes = 1) | (4)<br>Obesity (Yes =1) | (5)<br>Smoker<br>(Yes = 1) | (6)<br>Daily drinker<br>(Yes = 1) |
|-----------------------------------------------------------------------------------|--------------------------------------------------|-----------------------------------------|---------------------------------------------|-------------------------|----------------------------|-----------------------------------|
| <b><i>Panel A. Mean Unemployment Rate around year of graduation (3 years)</i></b> |                                                  |                                         |                                             |                         |                            |                                   |
| UR when graduating (3<br>years average)                                           | 0.717**<br>(0.355)                               | 0.035<br>(0.122)                        | 0.090<br>(0.067)                            | 0.078<br>(0.129)        | 0.265**<br>(0.114)         | 0.198*<br>(0.111)                 |
| (Education - 9) * UR                                                              | -0.113**<br>(0.054)                              | -0.033**<br>(0.016)                     | -0.044**<br>(0.009)                         | -0.048**<br>(0.019)     | -0.036**<br>(0.016)        | -0.026<br>(0.016)                 |
| Observations                                                                      | 50,590                                           | 28,537                                  | 87,450                                      | 17,734                  | 48,460                     | 19,699                            |
| R-squared                                                                         | 0.105                                            | 0.057                                   | 0.159                                       | 0.038                   | 0.060                      | 0.062                             |
| <b><i>Panel B: Unemployment Rate in year of graduation</i></b>                    |                                                  |                                         |                                             |                         |                            |                                   |
| UR when graduating                                                                | 0.806**<br>(0.373)                               | 0.045<br>(0.132)                        | 0.121*<br>(0.073)                           | 0.028<br>(0.120)        | 0.409**<br>(0.119)         | 0.208*<br>(0.122)                 |
| (Education - 9) * UR                                                              | -0.123**<br>(0.054)                              | -0.033**<br>(0.017)                     | -0.048**<br>(0.010)                         | -0.043**<br>(0.019)     | -0.039**<br>(0.017)        | -0.028<br>(0.017)                 |
| Observations                                                                      | 50,590                                           | 28,537                                  | 87,450                                      | 17,734                  | 48,460                     | 19,699                            |
| R-squared                                                                         | 0.105                                            | 0.057                                   | 0.159                                       | 0.038                   | 0.060                      | 0.062                             |

Note: see Table 2 notes for sample and specification details. The only difference is that marital status is dropped here. \*\* p<0.05, \* p<0.1.

**A10: Education, Unemployment Rates by Education and Outcomes in Eurobarometer**

|                                                                                                      | (1)                                       | (2)                              | (3)                               | (4)                  | (5)                 | (6)                        |
|------------------------------------------------------------------------------------------------------|-------------------------------------------|----------------------------------|-----------------------------------|----------------------|---------------------|----------------------------|
| Dependent variables                                                                                  | Income Quartile<br>(1:highest - 4:lowest) | General Poor<br>Health (Yes = 1) | Life dissatisfaction<br>(Yes = 1) | Obesity<br>(Yes = 1) | Smoker<br>(Yes = 1) | Daily drinker<br>(Yes = 1) |
| <b><i>Panel A: Unemployment rates by education level</i></b>                                         |                                           |                                  |                                   |                      |                     |                            |
| UR when graduating by<br>education level                                                             | 0.299<br>(0.224)                          | 0.074<br>(0.078)                 | 0.159**<br>(0.045)                | 0.073<br>(0.135)     | 0.455**<br>(0.073)  | 0.131*<br>(0.072)          |
| (Education - 9) * UR                                                                                 | -0.131**<br>(0.049)                       | -0.025<br>(0.019)                | -0.001**<br>(0.000)               | -0.036<br>(0.032)    | -0.055**<br>(0.019) | -0.016<br>(0.017)          |
| Observations                                                                                         | 50,590                                    | 28,440                           | 87,450                            | 17,697               | 48,367              | 19,656                     |
| R-squared                                                                                            | 0.263                                     | 0.063                            | 0.170                             | 0.097                | 0.075               | 0.066                      |
| <b><i>Panel B: Total Unemployment rates interacting with education level categorical dummies</i></b> |                                           |                                  |                                   |                      |                     |                            |
| UR when graduating                                                                                   | 1.195**<br>(0.379)                        | 0.142<br>(0.153)                 | 0.165*<br>(0.093)                 | -0.034<br>(0.290)    | 0.219<br>(0.147)    | 0.241<br>(0.171)           |
| UR * (Years of education 9 -12)                                                                      | -0.256<br>(0.300)                         | -0.149<br>(0.139)                | -0.195**<br>(0.093)               | 0.012<br>(0.251)     | -0.037<br>(0.138)   | -0.148<br>(0.172)          |
| UR * (Years of education 13+)                                                                        | -0.922*<br>(0.476)                        | -0.585**<br>(0.178)              | -0.478**<br>(0.110)               | -0.221<br>(0.338)    | -0.312*<br>(0.178)  | -0.270<br>(0.201)          |
| Observations                                                                                         | 50,590                                    | 28,440                           | 87,450                            | 17,697               | 48,367              | 19,656                     |
| R-squared                                                                                            | 0.263                                     | 0.064                            | 0.170                             | 0.096                | 0.074               | 0.066                      |

Note: see Table 2 notes for sample and specification details. \*\* p<0.05, \* p<0.1.
